# Supplementary material
Source: PubMed Central journal article supplement (PMC2825943)
Supplement: supp_78_3_914__1.pdf [file supp_78_3_914__1.pdf]

1 qRT-PCR raw data

2 Suplem.of Figure 1C

| Target       | Sample     |               |            |               |               |               |                      |               |
|--------------|------------|---------------|------------|---------------|---------------|---------------|----------------------|---------------|
|              | WT         |               | WT + Nore  |               | $\Delta qseC$ |               | $\Delta qseC$ + Nore |               |
|              | Average CT | Average CT SD | Average CT | Average CT SD | Average CT    | Average CT SD | Average CT           | Average CT SD |
| <i>rpoA</i>  | 14.29      | 0.07          | 14.73      | 0.06          | 15.01         | 0.08          | 15.19                | 0.03          |
| <i>flhDC</i> | 19.91      | 0.08          | 19.01      | 0.08          | 18.84         | 0.11          | 17.23                | 0.06          |

3

4

5 Suplem. of. Figure 1D.

| Target       | Sample     |               |               |               |                          |               |
|--------------|------------|---------------|---------------|---------------|--------------------------|---------------|
|              | WT         |               | $\Delta qseC$ |               | <i>qseC</i> <sup>+</sup> |               |
|              | Average CT | Average CT SD | Average CT    | Average CT SD | Average CT               | Average CT SD |
| <i>rpoA</i>  | 16.24      | 0.174         | 16.25         | 0.19          | 15.36                    | 0.41          |
| <i>flhDC</i> | 24.05      | 0.13          | 26.29         | 0.29          | 23.1                     | 0.07          |
| <i>fliA</i>  | 19.78      | 0.36          | 21.86         | 0.37          | 19.50                    | 0.40          |
| <i>motA</i>  | 26.17      | 0.17          | 28.79         | 0.31          | 25.51                    | 0.09          |

6

7

8 Suplem. of. Figure 3A.

| Target      | Sample     |               |               |               |                          |               |
|-------------|------------|---------------|---------------|---------------|--------------------------|---------------|
|             | WT         |               | $\Delta qseC$ |               | <i>qseC</i> <sup>+</sup> |               |
|             | Average CT | Average CT SD | Average CT    | Average CT SD | Average CT               | Average CT SD |
| <i>rpoA</i> | 10.05      | 0.03          | 10.67         | 0.05          | 12.17                    | 0.10          |
| <i>invF</i> | 16.83      | 0.11          | 17.74         | 0.06          | 18.46                    | 0.17          |
| <i>sipA</i> | 15.51      | 0.13          | 19.03         | 0.18          | 17.32                    | 0.15          |
| <i>sopB</i> | 15.75      | 0.10          | 17.99         | 0.14          | 18.55                    | 0.08          |

9

10

11

12

## 1 Suplem. of. Figure 3B.

| Target      | Sample     |               |            |               |               |               |                      |               |
|-------------|------------|---------------|------------|---------------|---------------|---------------|----------------------|---------------|
|             | WT         |               | WT + Nore  |               | $\Delta qseC$ |               | $\Delta qseC$ + Nore |               |
|             | Average CT | Average CT SD | Average CT | Average CT SD | Average CT    | Average CT SD | Average CT           | Average CT SD |
| <i>rpoA</i> | 10.07      | 0.06          | 13.36      | 0.04          | 10.62         | 0.04          | 11.38                | 0.06          |
| <i>invF</i> | 23.4       | 0.10          | 16.65      | 0.16          | 22.27         | 0.27          | 18.32                | 0.36          |
| <i>sopB</i> | 18.86      | 0.19          | 15.44      | 0.27          | 17.80         | 0.11          | 14.95                | 0.19          |
| <i>sifA</i> | 30.66      | 0.48          | 27.84      | 0.73          | 31.01         | 0.38          | 31.51                | 0.88          |

2

3

## 4 Suplem. of. Figure 3C.

| Target      | Sample     |               |               |               |                          |               |
|-------------|------------|---------------|---------------|---------------|--------------------------|---------------|
|             | WT         |               | $\Delta qseC$ |               | <i>qseC</i> <sup>+</sup> |               |
|             | Average CT | Average CT SD | Average CT    | Average CT SD | Average CT               | Average CT SD |
| <i>rpoA</i> | 15.11      | 0.05          | 15.75         | 0.07          | 16.90                    | 0.11          |
| <i>sifA</i> | 19.29      | 0.30          | 26.68         | 0.03          | 20.1                     | 0.12          |

5

6

## 7 Suplem. of. Figure 5A and B.

| Target      | Sample     |               |            |               |                      |               |                     |               |
|-------------|------------|---------------|------------|---------------|----------------------|---------------|---------------------|---------------|
|             | WT Spleen  |               | WT Liver   |               | $\Delta qseC$ Spleen |               | $\Delta qseC$ Liver |               |
|             | Average CT | Average CT SD | Average CT | Average CT SD | Average CT           | Average CT SD | Average CT          | Average CT SD |
| <i>rpoA</i> | 17.32      | 0.20          | 17.67      | 0.02          | 17.45                | 0.06          | 18.63               | 0.06          |
| <i>sipA</i> | 25.61      | 0.07          | 26.61      | 0.18          | 28.83                | 0.43          | 29.51               | 0.21          |
| <i>sopB</i> | 24.23      | 0.12          | 25.89      | 0.23          | 26.88                | 0.48          | 29.32               | 0.32          |
| <i>sifA</i> | 32.11      | 0.17          | 34.00      | 0.11          | 33.97                | 0.77          | 35.16               | 0.19          |
| <i>mgtB</i> | 24.25      | 0.15          | 26.67      | 0.07          | 26.23                | 0.11          | 29.64               | 0.24          |

8

9

10

11

12

## 1 Suplem. of. Figure 7.

| Target      | Sample                       |               |                             |               |                              |               |                             |               |
|-------------|------------------------------|---------------|-----------------------------|---------------|------------------------------|---------------|-----------------------------|---------------|
|             | WT Spleen Dbh +/+            |               | WT Liver Dbh +/+            |               | WT Spleen Dbh -/-            |               | WT Liver Dbh -/-            |               |
|             | Average CT                   | Average CT SD | Average CT                  | Average CT SD | Average CT                   | Average CT SD | Average CT                  | Average CT SD |
| <i>rpoA</i> | 21.96                        | 0.06          | 20.04                       | 0.05          | 22.25                        | 0.12          | 20.85                       | 0.08          |
| <i>sipA</i> | 29.34                        | 0.27          | 29.75                       | 0.08          | 31.11                        | 0.18          | 30.00                       | 0.12          |
| <i>sopB</i> | 29.53                        | 0.13          | 26.77                       | 0.15          | 28.79                        | 0.22          | 27.70                       | 0.23          |
| <i>mgtB</i> | 29.79                        | 0.15          | 29.22                       | 0.23          | 28.44                        | 0.19          | 30.05                       | 0.17          |
| Target      | Sample                       |               |                             |               |                              |               |                             |               |
|             | $\Delta qseC$ Spleen Dbh +/+ |               | $\Delta qseC$ Liver Dbh +/+ |               | $\Delta qseC$ Spleen Dbh -/- |               | $\Delta qseC$ Liver Dbh -/- |               |
|             | Average CT                   | Average CT SD | Average CT                  | Average CT SD | Average CT                   | Average CT SD | Average CT                  | Average CT SD |
| <i>rpoA</i> | 20.17                        | 0.08          | 21.07                       | 0.06          | 23.34                        | 0.07          | 22.34                       | 0.23          |
| <i>sipA</i> | 30.83                        | 0.31          | 29.52                       | 0.15          | 32.27                        | 0.33          | 31.70                       | 0.25          |
| <i>sopB</i> | 25.1                         | 0.12          | 28.58                       | 0.12          | 28.41                        | 0.32          | 27.9                        | 0.18          |
| <i>mgtB</i> | 24.93                        | 0.13          | 30.03                       | 0.09          | 28.99                        | 0.22          | 31.12                       | 0.37          |

2

## 3 Suplem. of. Figure 8.

| Target      | Sample     |               |            |               |            |               |
|-------------|------------|---------------|------------|---------------|------------|---------------|
|             | LB         |               | Spleen     |               | Liver      |               |
|             | Average CT | Average CT SD | Average CT | Average CT SD | Average CT | Average CT SD |
| <i>rpoA</i> | 12.48      | 0.12          | 13.32      | 0.20          | 13.67      | 0.02          |
| <i>sipA</i> | 15.51      | 0.13          | 25.61      | 0.07          | 26.61      | 0.18          |
| <i>sopB</i> | 18.86      | 0.19          | 24.23      | 0.12          | 25.89      | 0.23          |
| <i>invF</i> | 23.4       | 0.10          | 17.42      | 0.42          | 16.96      | 0.31          |
| <i>sifA</i> | 30.66      | 0.48          | 22.11      | 0.17          | 21.00      | 0.11          |
| <i>mgtB</i> | 22.38      | 0.15          | 20.25      | 0.15          | 21.67      | 0.07          |
| <i>basS</i> | 17.44      | 0.30          | 27.20      | 0.08          | 29.02      | 0.41          |
| <i>qseB</i> | 22.05      | 0.18          | 16.86      | 0.13          | 16.64      | 0.22          |

4

5
